# Supplementary material for: Development of a Three-Dimensional Multi-Modal Perfusion-Thermal Electrode System for Complete Tumor Eradication
Source: MDPI journal article supplement (doi:10.3390/cancers14194768), 2022-09-29
Supplement: s1 [file s1]

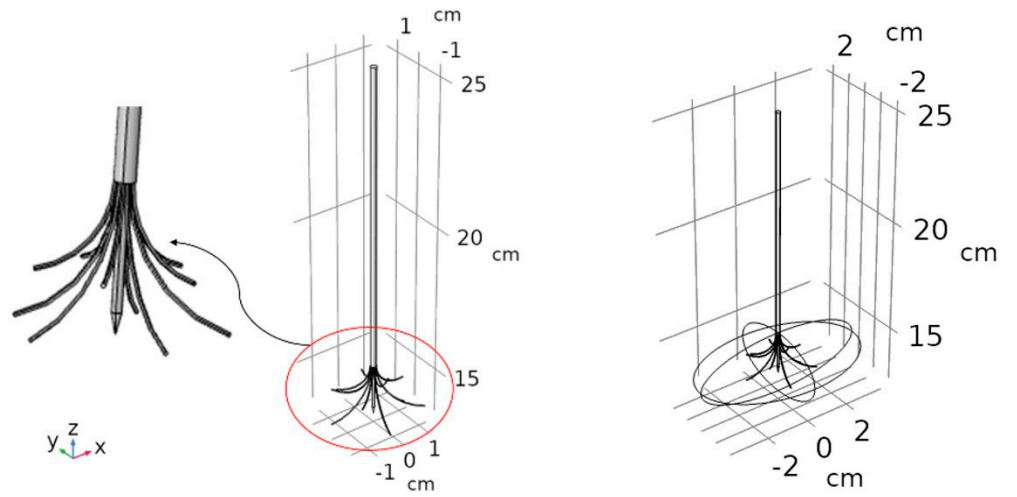

**Figure S1. The configuration of the electrode prongs and tumor.** The 3D multi-model RF electrode is composed of 11 prongs containing 5 long-curved prongs, 5 short-curved prongs, and 1 straight electro core.
